# Supplementary material for: Lifestyle interventions for type 2 diabetes management among migrants and ethnic minorities living in industrialized countries: a systematic review and meta-analyses
Source: HighWire-hosted journal article supplement (doi:10.1136/bmjdrc-2020-001924), 2021-04-01
Supplement: bmjdrc-2020-001924supp002_data_supplement.pdf [file bmjdrc-2020-001924supp002_data_supplement.pdf]

**Table 1. Intervention characteristics of studies to manage diabetes among migrants and ethnic minorities living in industrialized countries**

| Author, (Year), Country   | Study design | Duration  | Study population                                                 | Country of study conducted | Study Population, age and sex                                                                            | Intervention group                                                                                                                                                                                                                                                                                                                                                                                                                                                                                           | Control Group                                                                            |
|---------------------------|--------------|-----------|------------------------------------------------------------------|----------------------------|----------------------------------------------------------------------------------------------------------|--------------------------------------------------------------------------------------------------------------------------------------------------------------------------------------------------------------------------------------------------------------------------------------------------------------------------------------------------------------------------------------------------------------------------------------------------------------------------------------------------------------|------------------------------------------------------------------------------------------|
| Lorig et al 2008, USA     | RCT          | 18 months | Spanish-speaking adults with type 2 diabetes                     | USA                        | Total: 567; Mean age: Int. 52.9 (13.2); Cont: 52.8 (13.4). Female 57.1% and 67.2%                        | 6-week community-based, peer-led SDSMP, followed by 15 months monthly automated telephone messages<br>The SDSMP was a 6-week program offered 2.5 h weekly by two peer leaders.<br>Programs were held in community settings and group sizes ranged from 10 to 15 including participants' family member and friends<br>Participants were given their choice of listening or not listening to 90 minutes vignettes about various aspects of diabetes, and each of 15 vignettes was offered twice over 15 months | Usual care                                                                               |
| Thom et al., 2013, USA    | RCT          | 6 months  | Low income English and Spanish speaking adults with Diabetes     | USA                        | Coaching arm (n=145) vs. usual care (n=151) arm: Age: 56.3 (10.3) vs 54.1 (10.4); Female: 51.4% vs 53.0% | Potential peer coaches attended 36 hours of training over 8 weeks in either English or Spanish<br>Coaches helped patients design action plans to achieve goals chosen by the patient.<br>Coaching sessions were telephone contacted at least twice a month and 2 or more in-person contacts over 6 months                                                                                                                                                                                                    | Usual care                                                                               |
| Safford et al., 2013, USA | RCT          | 12 months | African American adults with T2DM of under-resourced areas in US | USA                        | Baseline: 360<br>Mean age: Int 59.2, Cont. 61.9 years.<br>Female: 75.3%, African American: 87.4%         | Intervention participants were paired with peer coaches; received telephone interactions weekly for the first 8 weeks, then monthly for a total of 10 months                                                                                                                                                                                                                                                                                                                                                 | Received a 1-hour diabetes ed. class and a personalized diabetes report card at baseline |
| Lujan et al., 2007, USA   | RCT          | 6 months  | Mexican American adults with diabetes                            | USA                        | Total 149 (Int 75, Con 74); Mean age: 58 years; Female: 81%                                              | Promotoras were bilingual clinic employees who had received 60 hours of training on diabetes self-management. A team of 2 promotoras delivered 8 weekly 2-hour, participative group classes and telephone follow-up                                                                                                                                                                                                                                                                                          | Received usual one-on-one patient education by the clinic staff                          |
| Long et al., 2012, USA    | RCT          | 3 weeks   | African American Veterans with uncontrolled diabetes             | USA                        | Int vs. Con. Total: Int. 38, Cont. 39. Age: 60 vs 60, Females: 0.0% vs 8.0%.                             | Those matched with the peer mentor received support from peers in terms of goal setting, dealing with diabetes, getting support and managing with diabetes and its' associated conditions. Telephone calls were also encouraged between peer mentor and mentee in order to discuss managing with diabetes.                                                                                                                                                                                                   | Usual care                                                                               |

|                              |                           |           |                                                                                                           |       |                                                                                                                                                 |                                                                                                                                                                                                                                                                                                                                                                             |                                                                                                                                      |
|------------------------------|---------------------------|-----------|-----------------------------------------------------------------------------------------------------------|-------|-------------------------------------------------------------------------------------------------------------------------------------------------|-----------------------------------------------------------------------------------------------------------------------------------------------------------------------------------------------------------------------------------------------------------------------------------------------------------------------------------------------------------------------------|--------------------------------------------------------------------------------------------------------------------------------------|
| Culica et al., 2008, USA     | Quasi-experimental design | 12 months | Patients of all ethnic backgrounds were included                                                          | USA   | Full participants in CoDE: 36; Partial participants in CoDE: 19<br>Total: Female (64%); Age range: 18-45 yrs 40%; >45 yrs 60%                   | Full participants were those who attended all seven visits specified in the protocols for the CoDE program<br>Three 60-minute individual education visits, followed by 60-minute quarterly assessment and case management visits<br>Bilingual CHWs were responsible for delivery of the entire intervention                                                                 | Partial participants were patients who attended visits 1 through 3 and visit 7 and missed any of quarterly follow up visit 4 thru 6. |
| Kangovi et al., 2017, USA    | RCT                       | 6 months  | African American and Hispanic                                                                             | USA   | Total 302; Age: 56.3 years; Sex: Female >75%;                                                                                                   | <b>Goal setting plus:</b> The goal-setting group received CHW led discussion took about 3–5 minutes to perform during scheduled primary care appointments, with no extra dedicated time.                                                                                                                                                                                    | <b>Goal setting alone:</b> Patients randomized to collaborative goal-setting alone received usual care                               |
| Frosch et al., 2011, USA     | RCT                       | 6 months  | Poorly managed African American and Latino T2DM patients                                                  | USA   | Total 201. Age: 56.7 (8.3) vs 54.3 (8.9); Males: 46 vs 57;                                                                                      | Received intervention package consisting of a 24-minute video behaviour support intervention with a workbook and 5 sessions of telephone coaching by a trained diabetes nurse or a 20-page brochure developed by the National Diabetes Education Program                                                                                                                    | Usual care                                                                                                                           |
| Lima et al., 2017, Spain     | Clustered RCT             | 12 months | Patients with type 2 diabetes with low educational level Caucasian and Romany/ others                     | Spain | Total: 184; Int: 90; Con: 94<br>Female: 55.43%; Mean age: 61.04 vs. 62.27                                                                       | GPs consistently using a diabetes self-management record sheet (DSMRS) as part of the consultation<br>patients were offered a take home copy of the DSMRS and encouraged to discuss it with their relatives                                                                                                                                                                 | GPs allocated to the control group provided standard care                                                                            |
| Tsimikas et al., 2011, USA   | Clustered RCT             | 10 months | Low-income 207 Mexican Americans with type 2 diabetes                                                     | USA   | Mean age: Int vs. Con: 52.2 vs. 49.2; Female: 66.3% vs 74.8;                                                                                    | Participants (n = 104) attended eight weekly, 2-h DSM classes and subsequent monthly support groups, led by a trained peer educator                                                                                                                                                                                                                                         | Control participants (n = 103) continued their usual medical care at the clinics                                                     |
| Keyserling et al., 2002, USA | RCT                       | 12 months | African American women with diagnosed T2DM in: clinics only; clinics or community or minimal intervention | USA   | Mean age: 58.5, 59.8, 59.2 years respectively; Gender: all females.<br>175 (88%) at 6 months and 167 (84%) participants completed PA assessment | Groups A and B received the clinic-based component, which included individual counselling visits at months 1, 2, 3, and 4. In addition, group A also received the community-based component, which consisted of two group sessions and monthly telephone calls from a peer counsellor. Group A participants continued to receive monthly phone calls from a peer counsellor | Minimal intervention participants received educational materials for diabetes self-management.                                       |

|                                      |             |           |                                                     |             |                                                                                         |                                                                                                                                                                                                                                               |                                                                                                             |
|--------------------------------------|-------------|-----------|-----------------------------------------------------|-------------|-----------------------------------------------------------------------------------------|-----------------------------------------------------------------------------------------------------------------------------------------------------------------------------------------------------------------------------------------------|-------------------------------------------------------------------------------------------------------------|
| Brown et al., 2002, USA              | RCT         | 9 months  | Mexican Americans with type 2 diabetes              | USA         | Total: 252 (Female 50%); Mean age: Int. 54.7; Con. 53.3                                 | Instructional sessions on nutrition, self-monitoring of blood glucose, exercise, and other self-care topics and support group sessions to promote behaviour changes                                                                           | Usual care                                                                                                  |
| Brown et al., 2005, USA              | RCT         | 12 months | Mexican Americans with type 2 diabetes              | USA         | Total: 216; (Female: 130, Male: 86); Mean age: Compressed: 49.6 Extended: 49.6          | Compressed: eight weekly 2-h educational sessions followed by support sessions held at 3, 6, and 12 months                                                                                                                                    | Extended: series of 12 weekly 2-h sessions of DM self-management, followed by 14 2-h support group sessions |
| O'Hare et al., 2004, UK              | Cluster RCT | 12 months | South Asians residing in Coventry and Birmingham UK | UK          | Total 182 (Female: 85; Male 97) vs. 179 (Female 91, Male 88)                            | The diabetes nurse and trained bilingual link worker provided educational sessions and support to patients with DM when they visited the health clinic.                                                                                       | Routine care by practice nurse and practices                                                                |
| Bellary et al., 2008, UK             | Cluster RCT | 24 months | South Asians residing in Coventry and Birmingham UK | UK          | Total: 868 (Female: 396; Male 472); vs. 617 (Female: 313; Male: 304)                    | The diabetes nurse and trained bilingual link worker provided educational sessions and support to patients with DM at 9 practices.                                                                                                            | Routine care by practice nurse and practices at 12 practices                                                |
| Middelkoop et al., 2001, Netherlands | RCT         | 6 months  | South Asians from Surinam with type 2 diabetes      | Netherlands | Total: 113 (Int. 53, Waitlist 60); Female: 56; Male: 57; Mean age: 51.7 vs. 54.8 years. | Specialist diabetes nurse and a dietitian provided intensive guidance on general diabetes information and healthy cooking for 3 months, followed by continuous support educational support for 3 months.                                      | Usual care to those in the wait-list group.                                                                 |
| Islam et al., 2018, USA              | RCT         | 6 months  | Bangladeshi migrants with Type 2 diabetes           | USA         | Total: 279 (Int 145, Control 134; Female: 135, Male: 144; Mean age: 54.2 vs. 55.6 years | Trained community health workers provided five 2-hour monthly group educational sessions and two one-on-one visits lasting ~90 min each. The intervention content was culturally and linguistically adapted for Bangladeshi community members | The Control group received only the first educational group session focused on introduction to diabetes.    |

RCT: Randomized controlled trial; Int.: Intervention; Cont.: Control; DM: Diabetes mellitus; T2DM: Type 2 diabetes mellitus; PA: Physical activity; CHW: Community health worker
